# Supplementary material for: Nucleoside 5′-O-monophosphorothioates as modulators of the P2Y14 receptor and mast cell degranulation
Source: PubMed Central journal article supplement (PMC5342483; doi:10.18632/oncotarget.12541), 2016-10-09
Supplement: oncotarget-07-69358-s001.pdf [file oncotarget-07-69358-s001.pdf]

# Nucleoside 5'-O-monophosphorothioates as modulators of the P2Y14 receptor and mast cell degranulation

## Supplementary Material

Figure S1

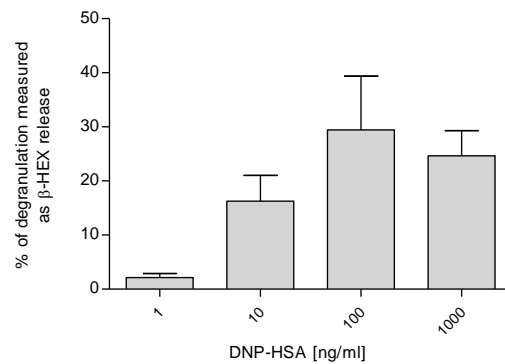

Figure S1: Concentration-dependent influence of DNP-HSA antigen on  $\beta$ -HEX release from RBL-2H3 cells. Mast cells were sensitized for 24 h with DNP-specific IgE antibody (0.5  $\mu$ g/ml) and incubated for 20 min with antigen. The spontaneous release (9.5%) was subtracted from the final data. Data represent the means  $\pm$  SD from at least three independent experiments.
